# Supplementary material
Source: PubMed Central journal article supplement (PMC3008275)
Supplement: supp_9_12_1825__1.pdf [file supp_9_12_1825__1.pdf]

```

Tetrahymena      MREVISIHVGGGGIQLVGNACWELFCLEHGIQPDGQMPSDKTIGGGDDAFNTFFSETGAGK 60
Toxoplasma      MREVISIHVGGAGIQLVGNACWELFCLEHGIQPDGQMPSDKTIGGGDDAFNTFFSETGAGK 60
*****.***.*****.*****.*****.*****.*****.*****.*****.*****

Tetrahymena      HVPRVFLDLEPTVIVDEVRTGTYRQLFHPEQLISGKEDAANNFARGHYTIGKEIVDLCLD 120
Toxoplasma      HVPRCVFLDLEPTVVDEVRTGTYRHLFHPEQLISGKEDAANNFARGHYTIGKEIVDLSLD 120
****.*****.*****.*****.*****.*****.*****.*****.*****.***

Tetrahymena      RIRKLADNCTGLQGEIVFNLSVGGGTGSGLGSLLLERLSVDYGKSKLGFYIYPSPOVSTA 180
Toxoplasma      RIRKLADNCTGLQGEIVFNLSVGGGTGSGLGSLLLERLSVDYGKSKLNFCSWPSPOVSTA 180
*****.***.*****.*****.*****.*****.*****.*****.*****.*****

Tetrahymena      VVEPYNSILSTHSLLEHTDVAVMLDNEAIYDICRRNLDIERPTYTNLNRLIAQVISSITA 240
Toxoplasma      VVEPYNSVLSHSLLEHTDVAVMLDNEAIYDICRRNLDIERPTYTNLNRLIAQVISSITA 240
*****.*****.*****.*****.*****.*****.*****.*****.*****.***

Tetrahymena      SIRFDGALNVDVTEFQTNLVPYPRIHFMSSYAPIISAEKAYHEQLSVAEITNSAFEPAN 300
Toxoplasma      SIRFDGALNVDVTEFQTNLVPYPRIHFMSSYAPIISAEKAYHEQLSVAEITNSAFEPAS 300
*****.*****.*****.*****.*****.*****.*****.*****.*****.***

Tetrahymena      MMAKCDPRHGKYMACSMYRGDVVPKDVNASIATIKTKRTIQFVDWCPTGFKVGINYQPP 360
Toxoplasma      MMAKCDPRHGKYMACCLMYRGDVVPKDVNAAVATIKTKRTIQFVDWCPTGFKCGINYQPP 360
*****.***.*****.*****.***.*****.*****.*****.*****.*****

Tetrahymena      TVVPGDLAKVMRAVCMISNSTAIAEVFSRLDHKFDLMYAKRAVHWYVGEEMEEGEFSE 420
Toxoplasma      TVVPGDLAKVMRAVCMISNSTAIAEVFSRMDHKFDLMYAKRAVHWYVGEEMEEGEFSE 420
*****.*****.*****.*****.*****.*****.*****.*****.*****.*****

Tetrahymena      AREDLAALEKDYEEVGIETAEGEGEEEGY---- 449
Toxoplasma      AREDLAALEKDYEEVGIETAEGEGEEEGYGDEY 453
*****.*****.*****.*****.*****.*****.*****.*****.*****.*****

```

Supplemental Figure S1: A clustal alignment of the amino acid sequence of *T. gondii*  $\alpha$ 1-tubulin and *T. thermophila*  $\alpha$ -tubulin. Residues that differ between the two proteins are highlighted in yellow. Locations of the point mutations H28Q, L136F, R243S, T239I and I252L that were introduced into *T. thermophila*  $\alpha$ -tubulin are boxed. Individual amino acids are colored to reflect their chemical properties: blue: acidic; green: hydroxyl/amine/basic/Q; magenta: basic; and red: small, hydrophobic (including aliphatic Y).
